# Supplementary material for: The PripA-TbcrA complex-centered Rab GAP cascade facilitates macropinosome maturation in Dictyostelium
Source: PubMed Central journal article supplement (PMC8980073; doi:10.1038/s41467-022-29503-1), 2022-04-04
Supplement: 41467_2022_29503_MOESM1_ESM.pdf [file 41467_2022_29503_MOESM1_ESM.pdf]

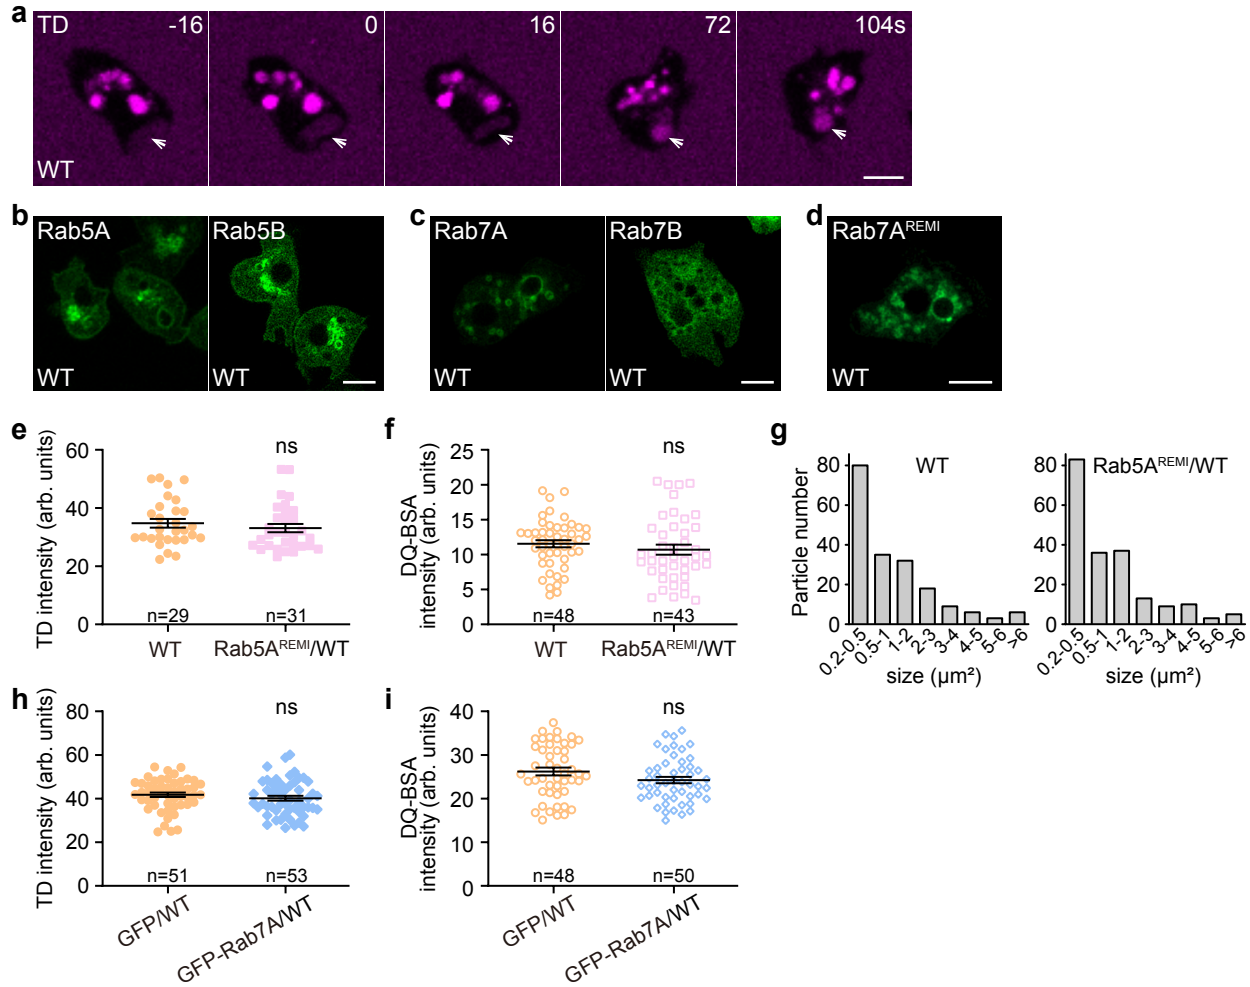

**Figure S1. Localization of Rab5 and Rab7.** (a) Time-lapse images of TD uptake. The arrows mark a newly formed macropinosome that shrunk over time. (b-c) Localization of GFP-tagged Rab5A, Rab5B, Rab7A, and Rab7B expressed from extrachromosomal vectors in WT cells. (d) Localization of GFP-Rab7A expressed from a stable copy integrated into the WT genome via REMI. (e-f) Quantification of TD uptake and DQ-BSA degradation in WT and GFP-Rab5A<sup>REMI</sup>/WT cells. (g) Quantification of the size distribution of TD-containing macropinosomes in WT and GFP-Rab5A<sup>REMI</sup>/WT cells. (h-i) Quantification of TD uptake and DQ-BSA degradation in GFP/WT and GFP-Rab7A/WT cells. Images were acquired after a 30-min incubation with TD or DQ-BSA. The scatter plots show data points with means and SEM. Significance was determined by two-tailed unpaired t test with Welch's correction. Scale bar = 5 μm. Source data for e-i are provided in this paper.

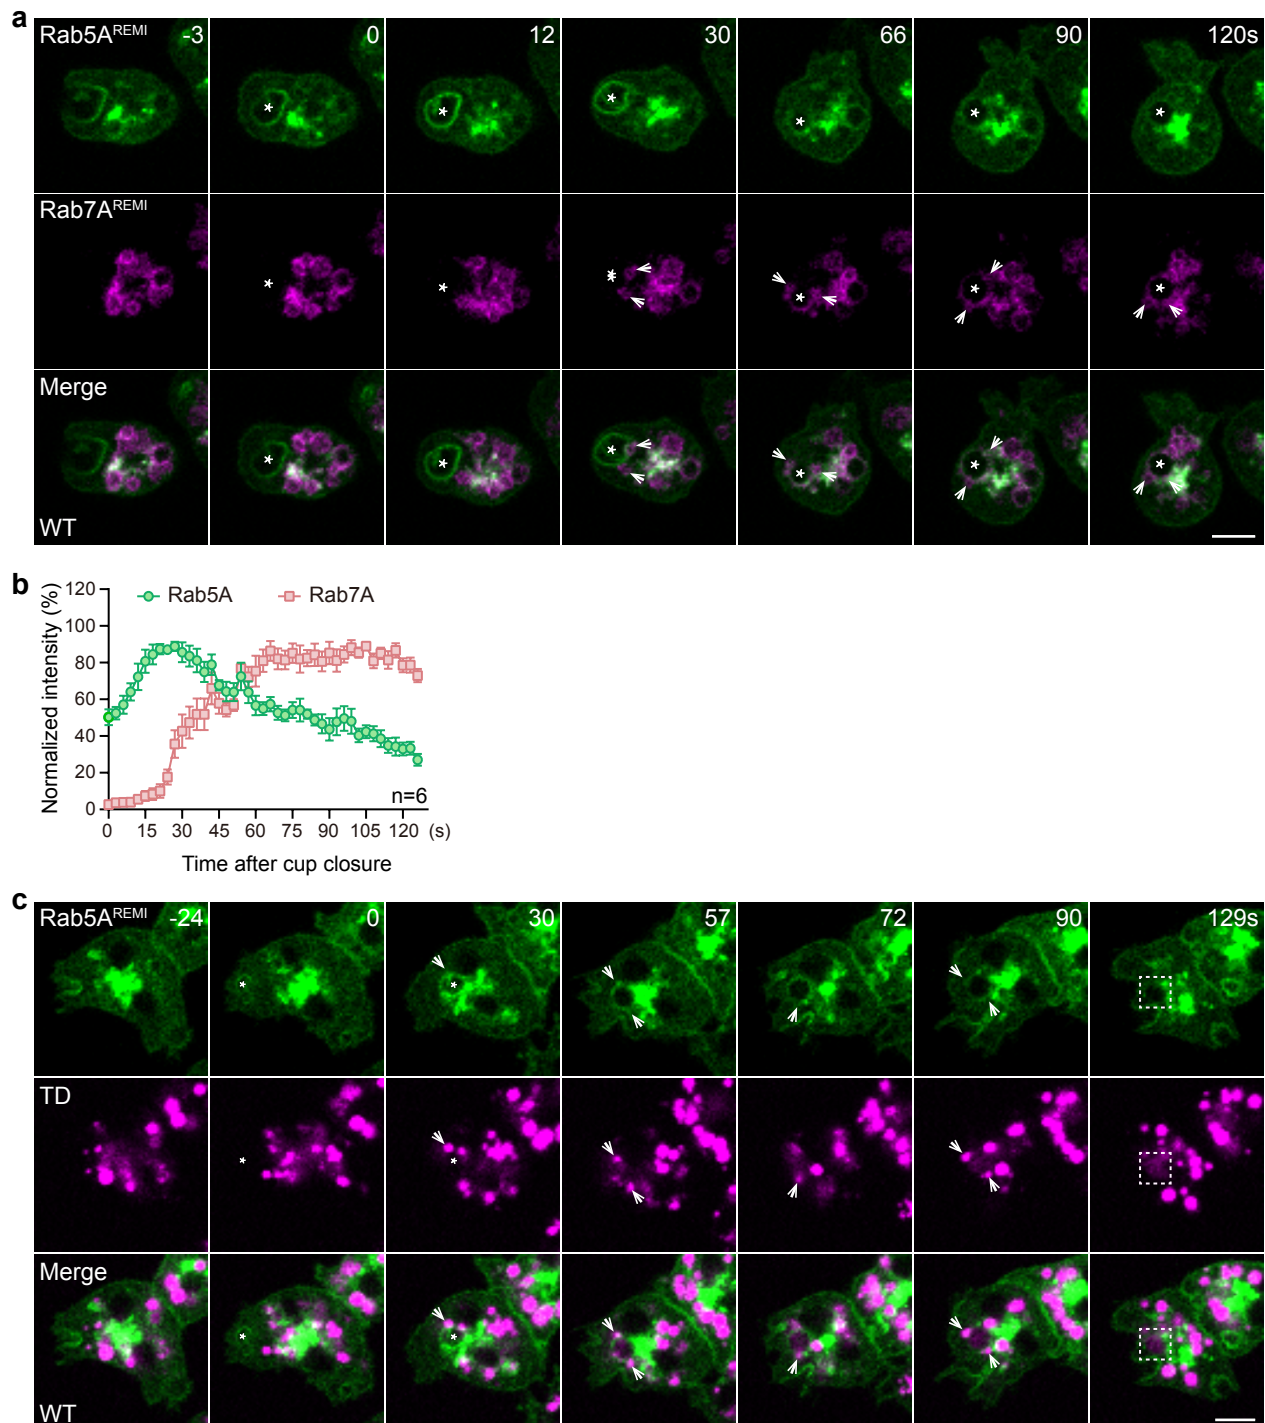

**Figure S2. Rab5-to-Rab7 conversion during macropinocytosis.** (a) Time-lapse images of macropinocytosis in WT cells expressing GFP-Rab5A and RFP-Rab7A from genome-integrated expression cassettes. The asterisks mark a newly enclosed macropinosome initially decorated by GFP-Rab5A<sup>REMI</sup>. The arrows mark RFP-Rab7A<sup>REMI</sup>-labeled late macropinosomes that surrounded and fused with the nascent macropinosome. (b) Quantification of the normalized fluorescent intensity changes of GFP-Rab5A<sup>REMI</sup> and RFP-Rab7A<sup>REMI</sup> on macropinosomes after cup closure (mean  $\pm$  SEM). (c) Time-lapse images of GFP-Rab5A<sup>REMI</sup>/WT cells pre-incubated with TD for 60 min. Images were acquired after TD was washed out. The arrows mark preformed macropinosomes containing bright TD signal. The asterisks and dashed boxes mark the newly generated macropinosome which gradually obtained TD signal. Scale bar = 5  $\mu$ m. Source data for b are provided in this paper.

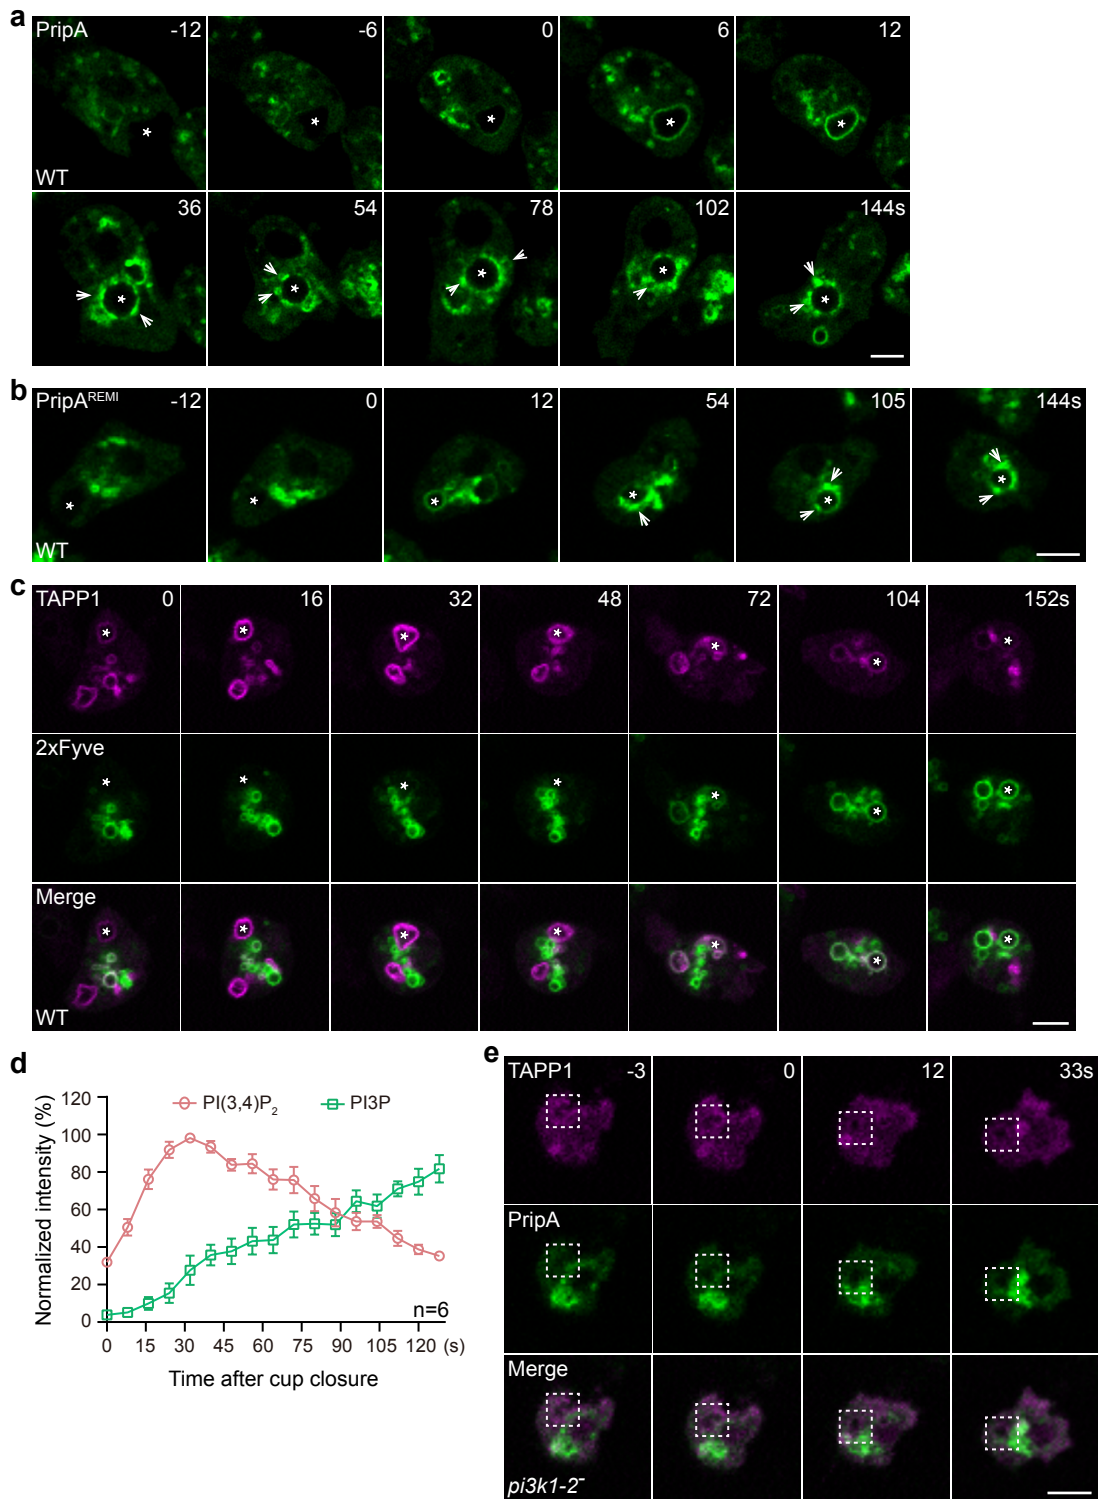

**Figure S3. Localization of PripA during macropinocytosis.** (a-b) Time lapse images of PripA-GFP expressed in WT cells from extrachromosomal vectors (a) or genome-integrated expression cassettes (b). The asterisks mark newly formed macropinosomes, and the arrows mark vesicles that surrounded and fused with newly formed macropinosomes. (c) Sequential accumulation of TAPP1-RFP and GFP-2× Fyve during macropinocytosis. The asterisks mark newly formed macropinosomes. (d) Quantification of the normalized fluorescent intensity changes of TAPP1-RFP and GFP-2× Fyve on macropinosomes after cup closure (mean ± SEM). (e) Localization of TAPP1-RFP and PripA-GFP in *pi3k1-2<sup>-</sup>* cells during macropinocytosis. The dashed boxes mark newly formed macropinosomes. Scale bar = 5 μm. Source data for d are provided in this paper.

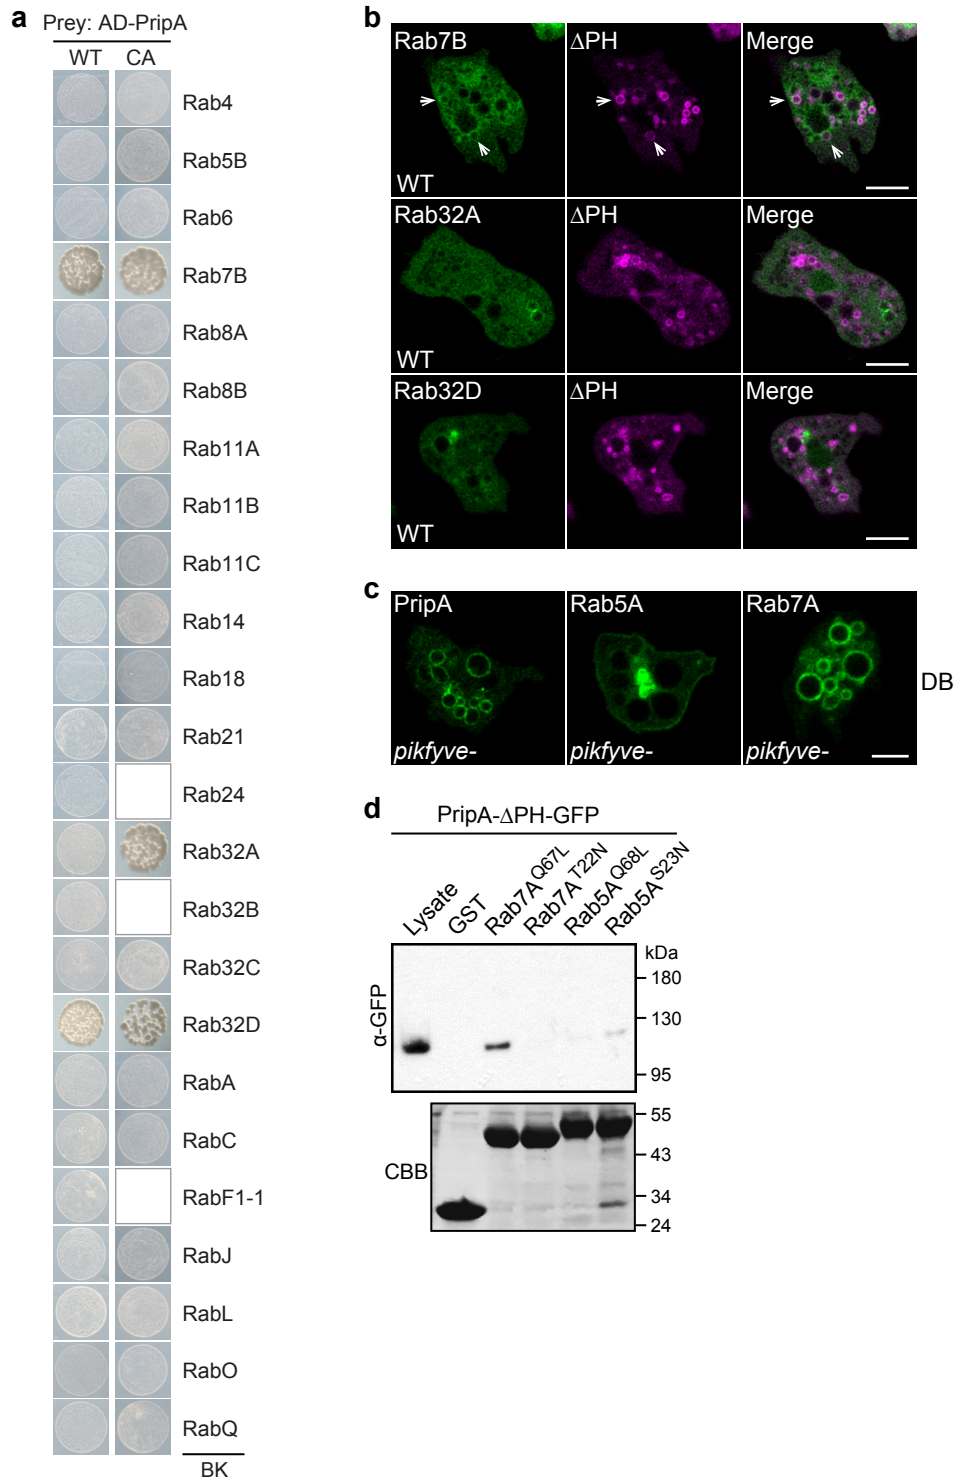

**Figure S4. PripA interacts with activated Rab7A.** (a) Yeast two-hybrid assay using PripA as prey and 26 Rab GTPases in their respective WT or CA forms as bait. The CA forms of Rab24, Rab32B, and RabF1-1 were not included because these proteins do not contain the conserved glutamine residue that stabilizes Rab proteins in an active conformation. (b) Co-localization of PripA- $\Delta$ PH-RFP with GFP-tagged Rab7B, Rab32A, and Rab32D. (c) Localization of PripA-GFP, GFP-Rab5A or GFP-Rab7A in *pikfyve*<sup>-</sup> cells cultured in developmental buffer (DB) for 30 min. Scale bar = 5  $\mu$ m. (d) Top: Western blot from pull-down of GST or GST-fused CA or DN forms of Rab5A and Rab7A beads with cell lysate expressing PripA- $\Delta$ PH-GFP. Bottom: the protein-transferred membrane was stained with CBB to show purified GST fusion proteins. Data was from one representative experiment out of two independent experiments. Source data for d are provided in this paper.



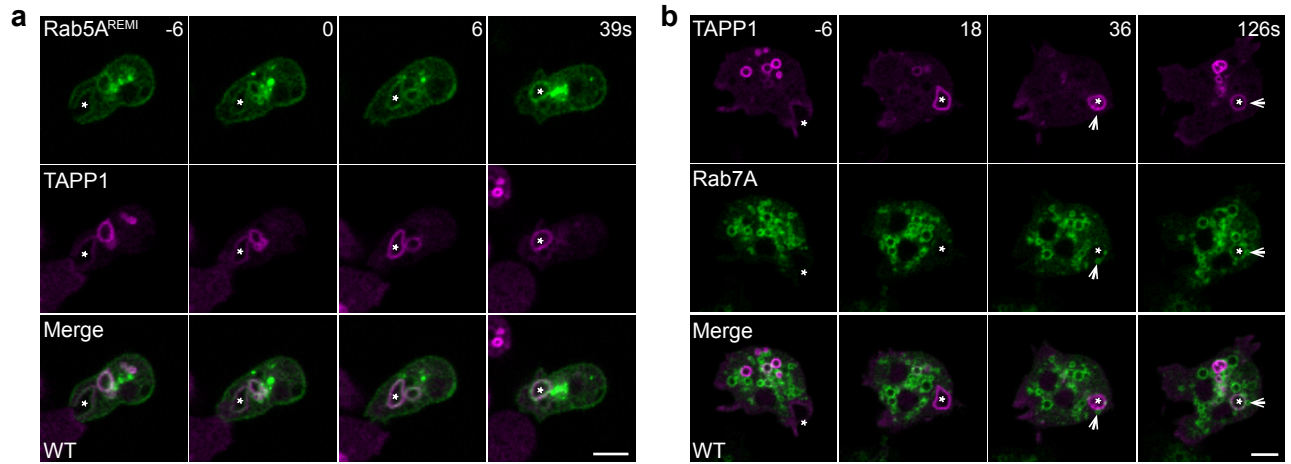

**Figure S5. Time-lapse images of protein localization during macropinocytosis.** (a) Co-localization of GFP-Rab5A<sup>REMI</sup> and TAPP1-RFP on nascent macropinosomes. (b) Localization of TAPP1-RFP and GFP-Rab7A. Scale bar = 5  $\mu$ m.

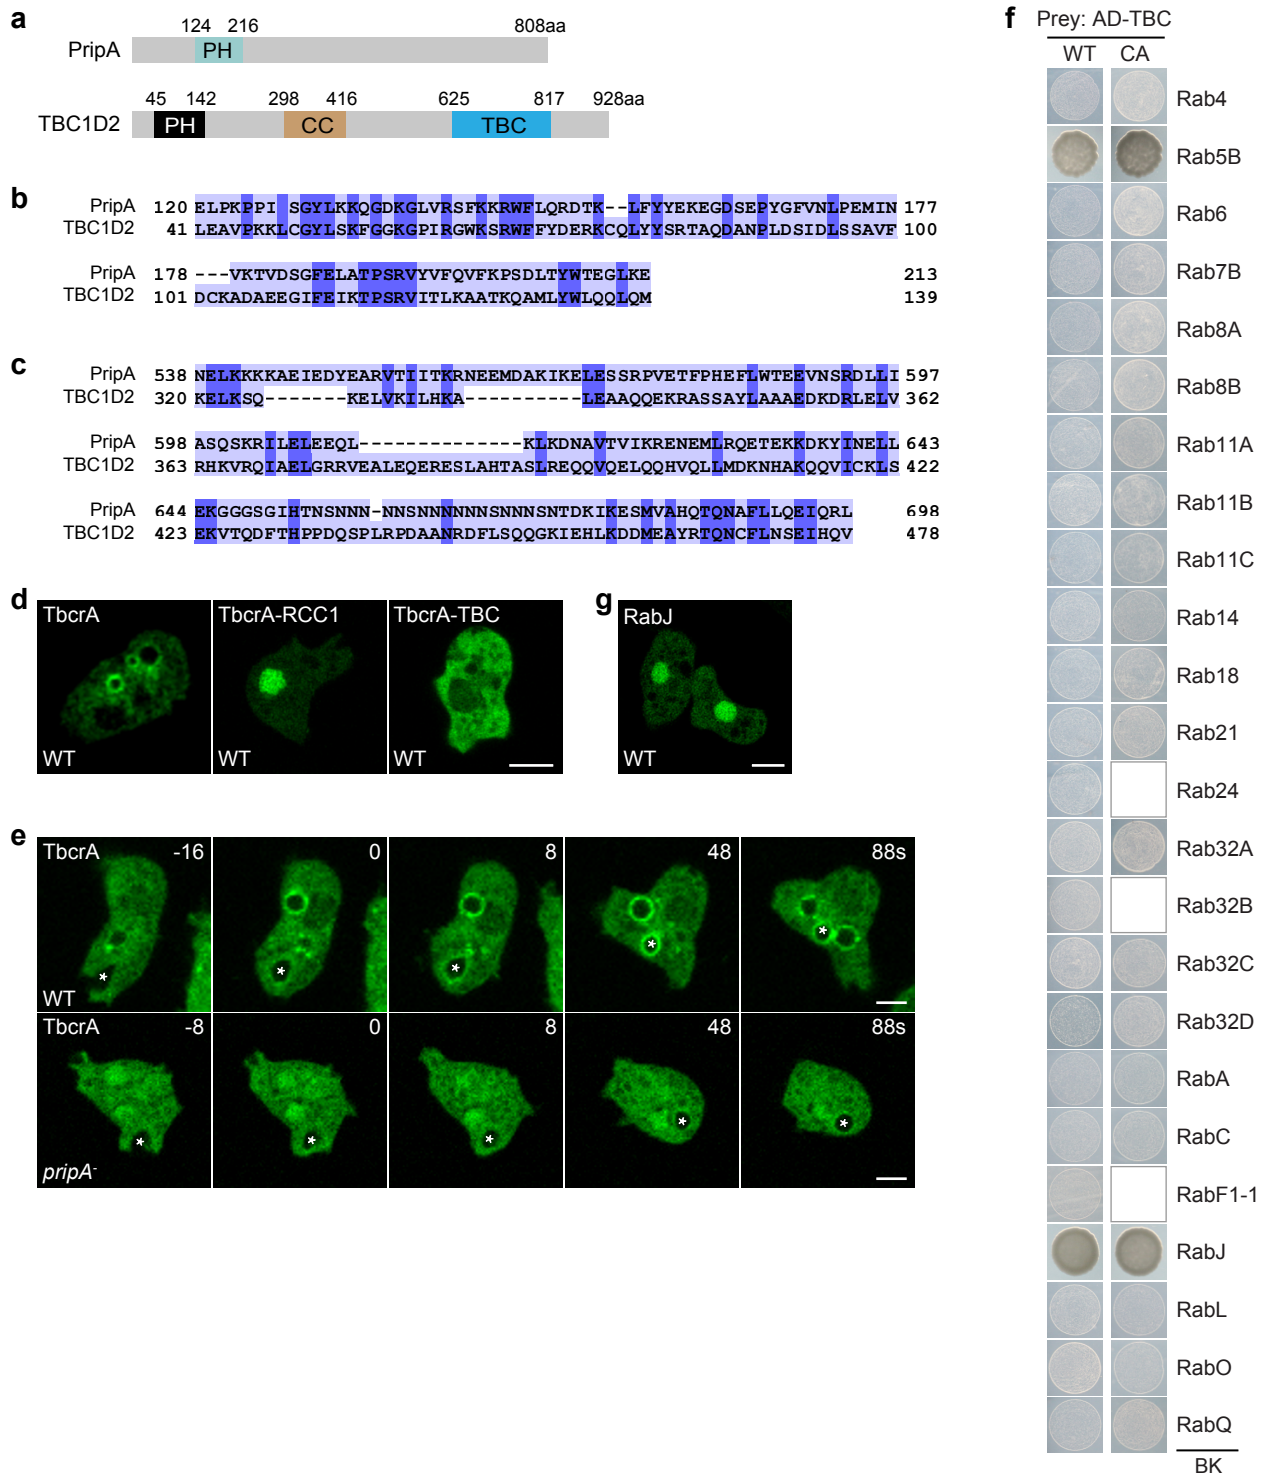

**Figure S6. PripA forms a complex with Tbcra, a putative Rab5 GAP.** (a) Schematic representation of PripA and human TBC1D2. (b) Sequence alignment of PripA (120-213 aa) and human TBC1D2 (41-139 aa). The sequences span the PH domains in PripA and TBC1D2. (c) Sequence alignment of PripA (538-698 aa) and human TBC1D2 (320-478 aa). (d) Localization of GFP-tagged Tbcra, Tbcra-RCC1, and Tbcra-TBC in WT cells. (e) Localization of GFP-Tbcra in WT and *pripA*<sup>-</sup> cells. Nascent macropinosomes are marked by asterisks. (f) Yeast two-hybrid assay using Tbcra-TBC as prey and 26 Rab GTPases in their respective WT or CA forms as bait. The CA forms of Rab24, Rab32B, and RabF1-1 were not included because these proteins do not contain the conserved glutamine residue that stabilizes Rab proteins in an active conformation. (g) Localization of GFP-RabJ in WT cells. Scale bar = 5 μm.

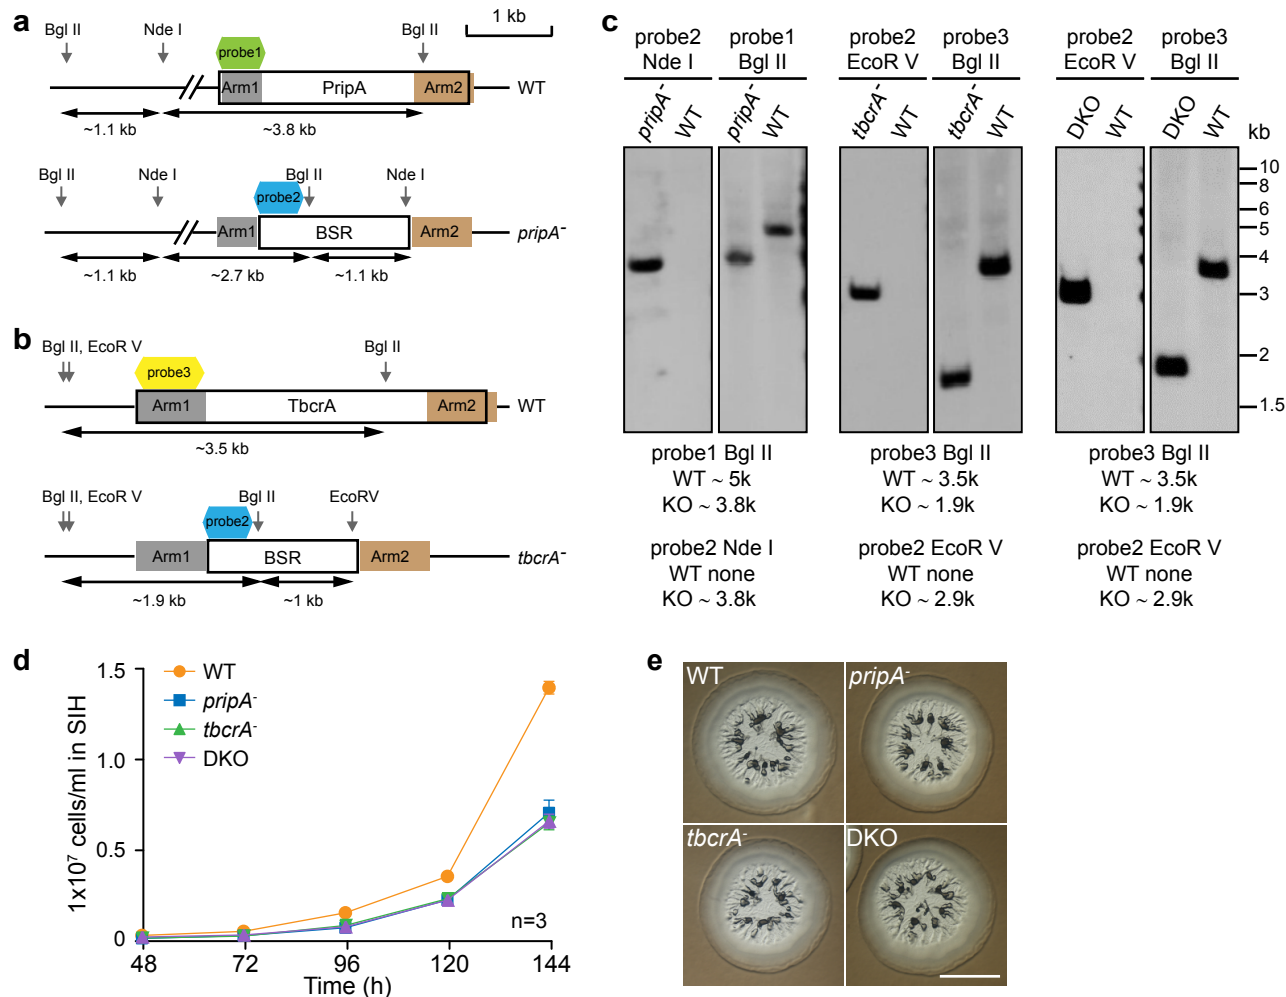

**Figure S7. Generation of *pripA*<sup>-</sup>, *tbcrA*<sup>-</sup>, and DKO cells.** (a-b) Design of the knockout constructs. A blasticidin resistant cassette (BSR) was inserted to replace part of the open reading frame of *pripA* or *tbcrA*. To generate DKO cells, the BSR cassette was first removed from *pripA*<sup>-</sup> cells, and the *tbcrA* gene was then disrupted. Arrows mark the sites where genomic DNA was digested for Southern blot analysis. (c) Targeted clones were confirmed by Southern blot analysis. (d) Growth curve of the indicated cells cultured in SIH medium in suspension (mean  $\pm$  SEM). Data was from 3 independent experiments. (e) The indicated cells were plated clonally with bacteria (*Klebsiella aerogenes*) on standard medium agar for 5 days. Scale bar = 5 mm. Source data for c and d are provided in this paper.

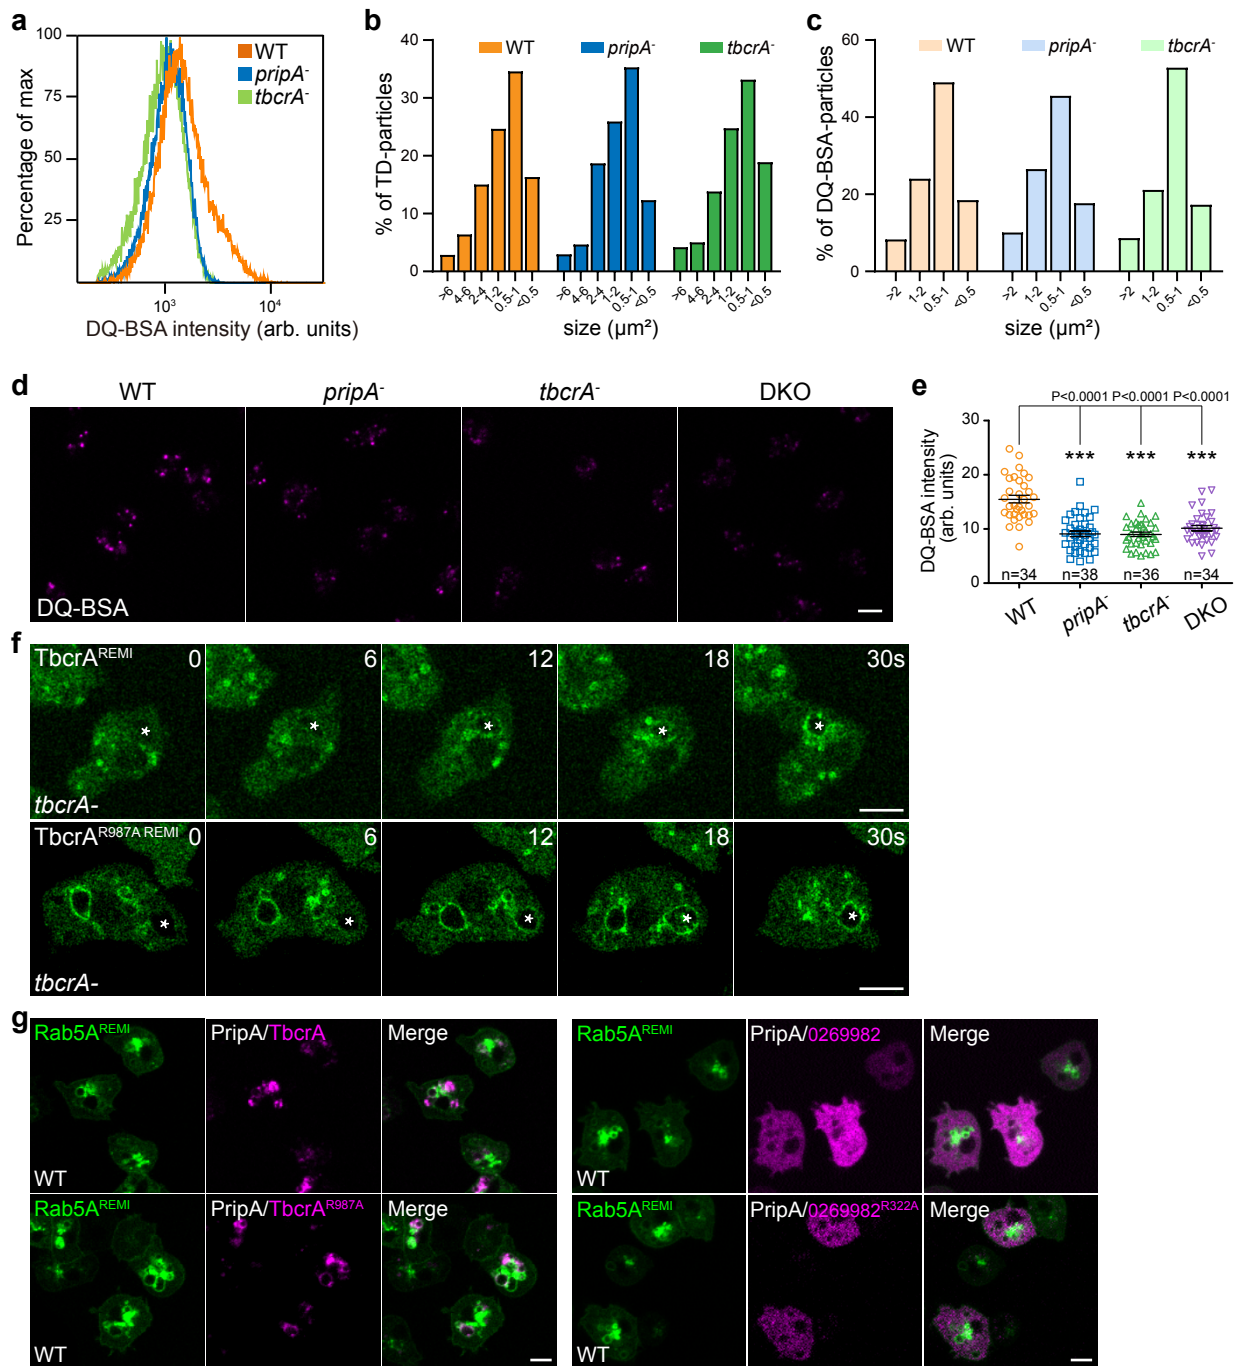

**Figure S8. The PripA-TbcrA complex regulates macropinosome maturation.** (a) DQ-BSA degradation activity measured by flow cytometry. Cells were incubated with DQ-BSA for 20 min. Each sample represents ~50,000 cells. Data was from one representative experiment out of two independent experiments. (b-c) Quantification of the size distribution of TD- or DQ-BSA-containing macropinosomes in the indicated cell lines. Images were acquired after a 30-min incubation. (d) Comparison of DQ-BSA degradation in the indicated cell lines. Images were acquired after a 20-min incubation. (e) Quantification of DQ-BSA degradation (means ± SEM). Significance was determined by one-way ANOVA with Dunnett posttest. (f) Localization of GFP-TbcrA and GFP-TbcrA<sup>R987A</sup> expressed from a stable copy integrated into the genome of *tbcra*<sup>-</sup>. (g) GFP-Rab5A<sup>REMI</sup>/WT cells were transformed with vectors expressing PripA together with RFP-TbcrA, RFP-TbcrA<sup>R987A</sup>, RFP-DDB\_G0269982, or RFP DDB\_G0269982<sup>R322A</sup>. Scale bar = 5 μm. Source data for b, c, and e are provided in this paper.



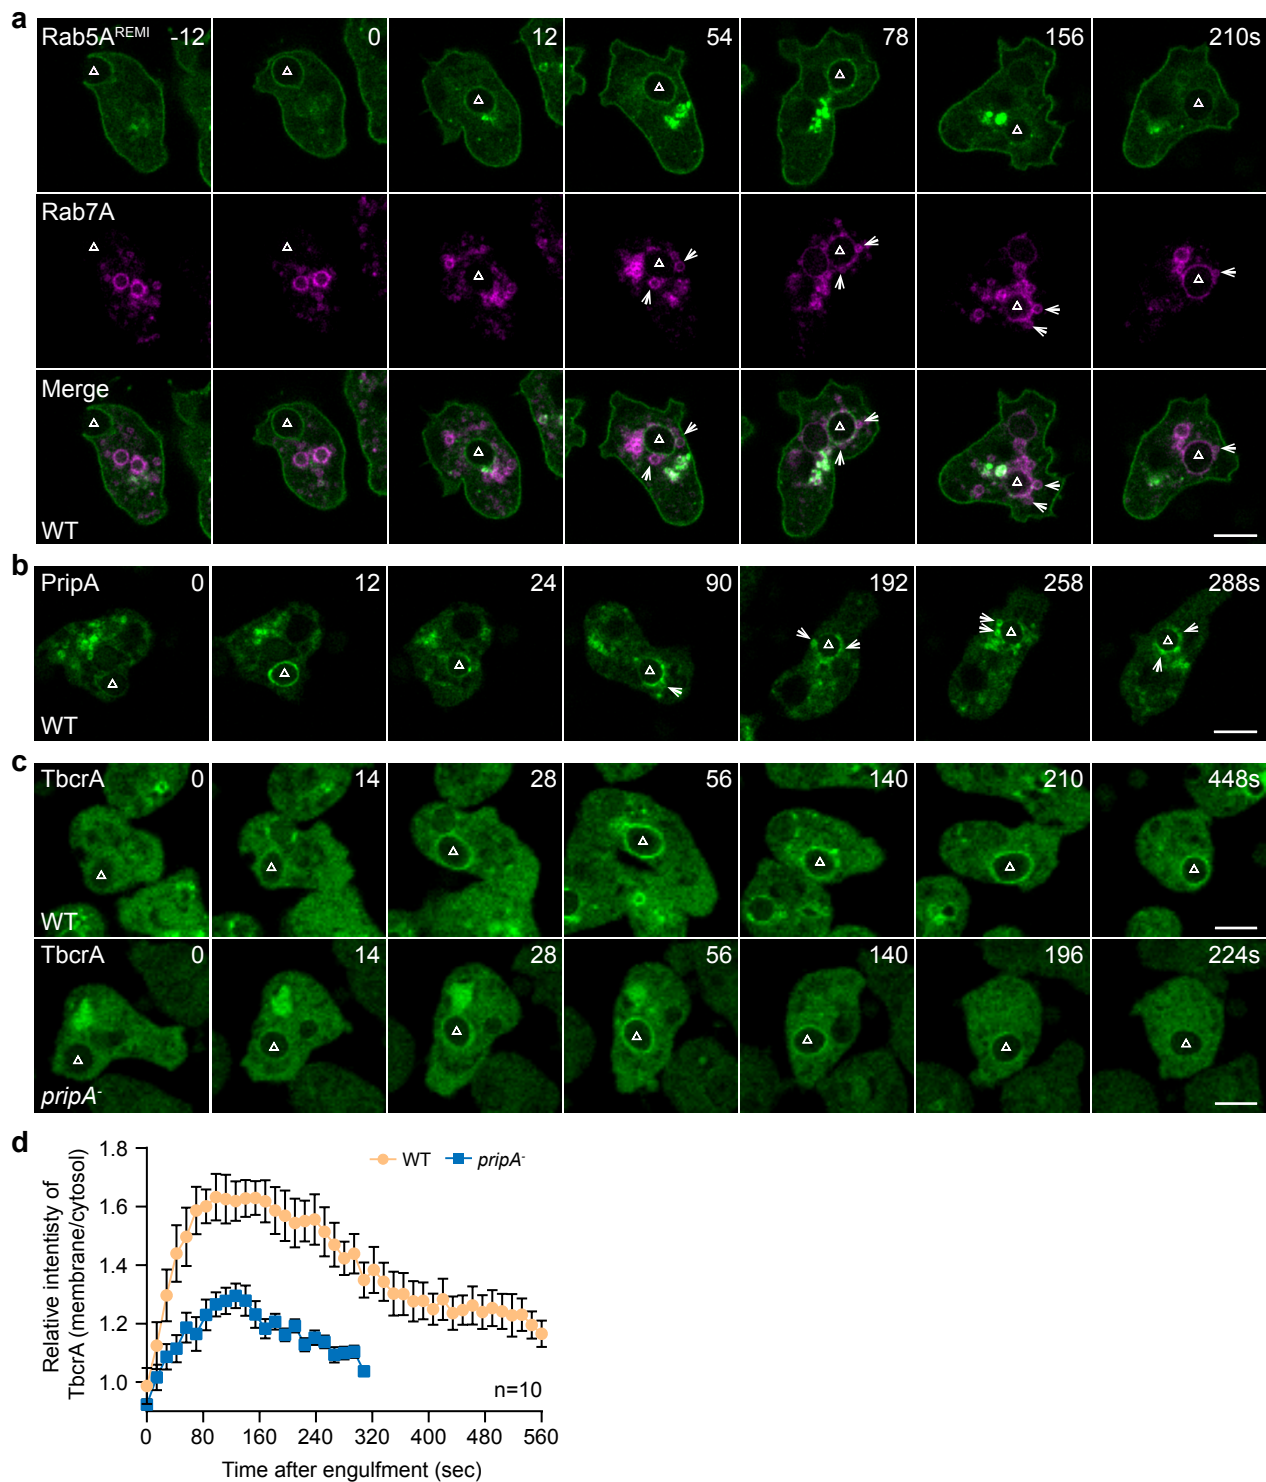

**Figure S9. Localization of Rab5, Rab7, PripA, and Tbcra during phagocytosis.** (a) Time-lapse images of yeast phagocytosis in GFP-Rab5A<sup>REMI</sup>/WT cells expressing RFP-Rab7A. The triangles mark a newly formed phagosome initially decorated by GFP-Rab5A<sup>REMI</sup>. The arrows mark Rab7-labeled vesicles that surrounded and fused with the nascent phagosome. (b) Time lapse images of yeast phagocytosis in WT cells expressing PripA-GFP. The triangles indicate a newly formed phagosome; the arrows mark smaller-sized vesicles labeled by PripA that surrounded the nascent phagosome. (c) Localization of GFP-Tbcra in WT and *pripA* during phagocytosis. (d) Quantification of the changes of fluorescent intensity of GFP-Tbcra on the phagosomal membrane relative to that in the cytosol (mean  $\pm$  SEM). Scale bar = 5  $\mu$ m. Source data for d are provided in this paper.

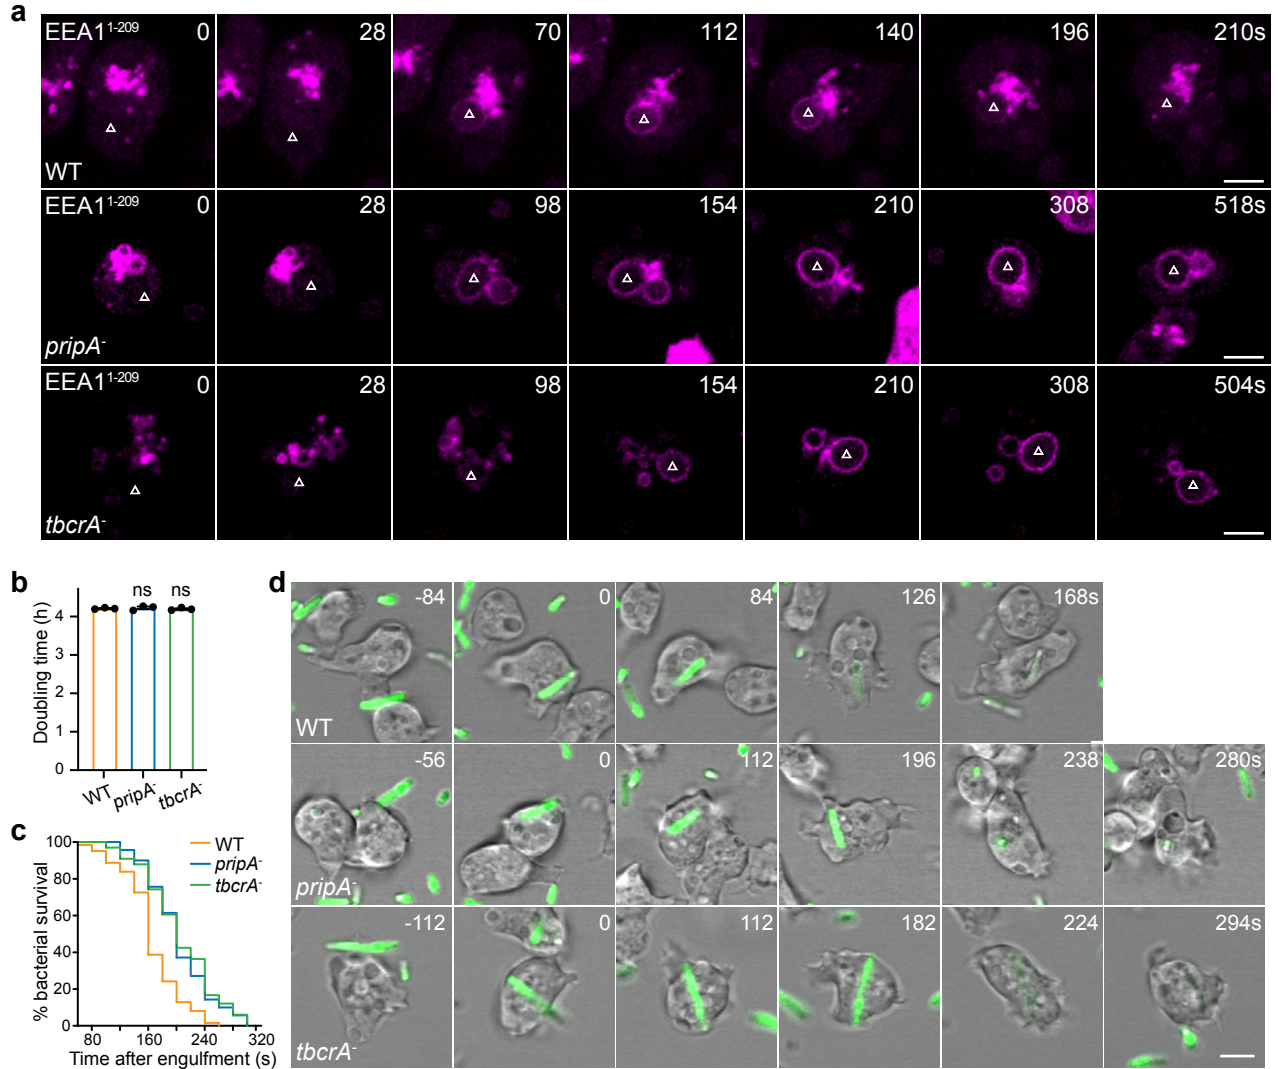

**Figure S10. The PripA-Tbcra complex regulates phagosome maturation.** (a) Localization of EEA1<sup>1-209</sup>-RFP in GFP-Rab5A<sup>REMI</sup>/WT cells or the same cells with deletion of *pripA* or *tbcra* during phagocytosis. The duration time of EEA1<sup>1-209</sup>-RFP on phagosomes was  $154 \pm 61$  s in WT,  $442 \pm 139$  s in *pripA*<sup>-</sup>, and  $521 \pm 116$  s in *tbcra*<sup>-</sup> cells (mean  $\pm$  SD,  $n = 6$  for WT,  $n = 15$  for *pripA*<sup>-</sup>,  $n = 11$  for *tbcra*<sup>-</sup>). (b) Generation time measured by growing cells in non-nutrient buffer containing live *Klebsiella aerogenes* (mean  $\pm$  SEM). Data was from 3 independent experiments. Significance was determined by one-way ANOVA with Dunnett posttest. (c) Time-lapse images of cells phagocytosing GFP-expressing *E. coli*. The point of bacterial cell permeabilization and death was inferred from the quenching of GFP fluorescence. (d) Quantification of bacterial survival. The Kaplan-Meier graph was based on the persistence of bacterial GFP-fluorescence within cells after phagocytosis. At least 60 bacteria were followed in each cell line. Bacteria survived significantly longer in *pripA*<sup>-</sup> and *tbcra*<sup>-</sup> cells than WT ( $p < 0.001$ , Mantel-Cox test). Scale bar = 5  $\mu$ m. Source data for b and c are provided in this paper.

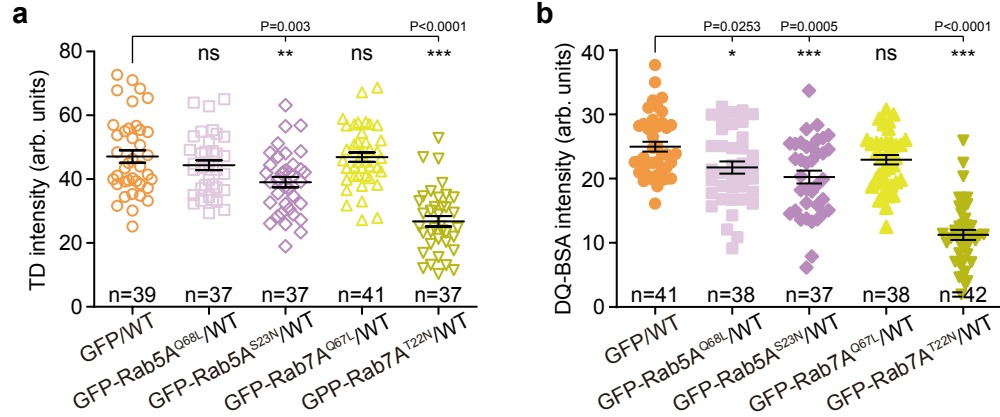

**Figure S11. TD uptake and DQ-BSA degradation in WT cells expressing CA or DN form of Rab5A or Rab7A.** (a) Quantification of TD uptake. (b) Quantification of DQ-BSA degradation. Images were acquired after a 30-min incubation. The scatter plots show data points with means and SEM. Significance was determined by one-way ANOVA with Dunnett posttest. Source data for a and b are provided in this paper.

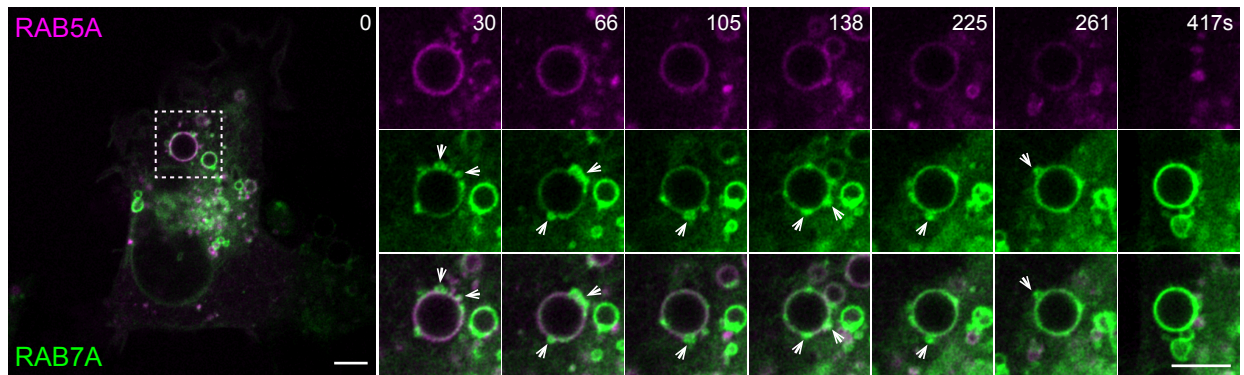

**Figure S12. Macropinocytosis in HT1080 cells.** Time-lapse images of the RAB5-to-RAB7 conversion on macropinosomes in HT1080 cells stably expressing mCherry-RAB5A and mEmerald-RAB7A. The arrows mark RAB7A-labeled vesicles that surrounded and fused with the RAB5A-positive macropinosome. Scale bar = 5  $\mu$ m.



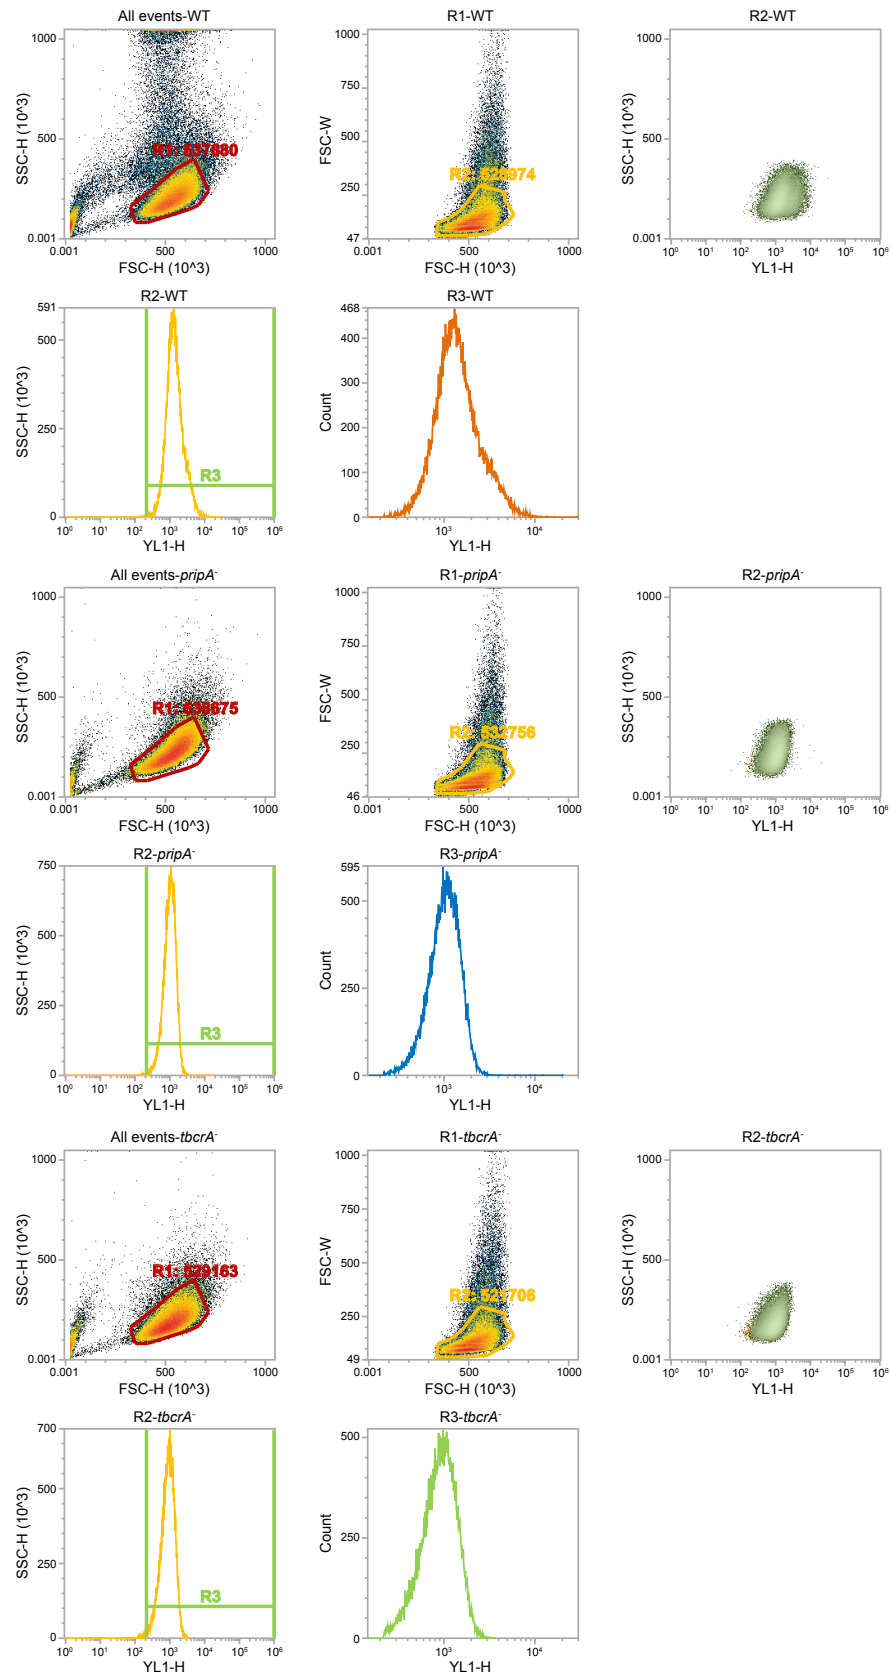

**Figure S13. Gating strategies for flow cytometry analysis.** Viable cells were gated by FSC-H/SSC-H scatter plots; from this gate, single cells were gated by FSC-H/FSC-W scatter plots. Cells in the single cell gate were measured for DQ-BSA fluorescence.

| <b>Table S1: Plasmids used in this study.</b>               |                        |                           |
|-------------------------------------------------------------|------------------------|---------------------------|
| <b>Plasmid for expression in <i>Dictyostelium</i> cells</b> | <b>References</b>      | <b>Drug for selection</b> |
| pDM323-PripA                                                | This Study             | G418 (20 µg/ml)           |
| pDM323-PripA-PH                                             | This Study             | G418 (20 µg/ml)           |
| pDM323-PripA-ΔPH                                            | This Study             | G418 (20 µg/ml)           |
| pDM451-PripA                                                | This Study             | Hygromycin (50 µg/ml)     |
| pDM451-PripA-PH                                             | This Study             | Hygromycin (50 µg/ml)     |
| pDM451-PripA-ΔPH                                            | This Study             | Hygromycin (50 µg/ml)     |
| pDM317-TbcrA                                                | This Study             | G418 (20 µg/ml)           |
| pDM317-TbcrA-RCC1                                           | This Study             | G418 (20 µg/ml)           |
| pDM317-TbcrA-TBC                                            | This Study             | G418 (20 µg/ml)           |
| pDM317-TbcrA <sup>R987A</sup>                               | This Study             | G418 (20 µg/ml)           |
| pDM449-TbcrA-PripA                                          | This Study             | Hygromycin (50 µg/ml)     |
| pDM449-TbcrA <sup>R987A</sup> -PripA                        | This Study             | Hygromycin (50 µg/ml)     |
| pDM449-DDB_G0269982-PripA                                   | This Study             | Hygromycin (50 µg/ml)     |
| pDM449-DDB_G0269982 <sup>R322A</sup> -PripA                 | This Study             | Hygromycin (50 µg/ml)     |
| pDM449-Rab5A                                                | This Study             | Hygromycin (50 µg/ml)     |
| pDM449-Rab7A                                                | This Study             | Hygromycin (50 µg/ml)     |
| pDM317-Rab5A                                                | This Study             | G418 (20 µg/ml)           |
| pDM317-Rab7A                                                | This Study             | G418 (20 µg/ml)           |
| pDM317-Rab5A <sup>Q68L</sup>                                | This Study             | G418 (20 µg/ml)           |
| pDM317--Rab5A <sup>S23N</sup>                               | This Study             | G418 (20 µg/ml)           |
| pDM317--Rab7A <sup>Q67L</sup>                               | This Study             | G418 (20 µg/ml)           |
| pDM317--Rab7A <sup>T22N</sup>                               | This Study             | G418 (20 µg/ml)           |
| pDM317-Rab5B                                                | This Study             | G418 (20 µg/ml)           |
| pDM317-Rab7B                                                | This Study             | G418 (20 µg/ml)           |
| pDM317-Rab32A                                               | This Study             | G418 (20 µg/ml)           |
| pDM317-Rab32D                                               | This Study             | G418 (20 µg/ml)           |
| pDM317-RabJ                                                 | This Study             | G418 (20 µg/ml)           |
| pDM451-VacA                                                 | This Study             | Hygromycin (50 µg/ml)     |
| pDM451-TAPP1                                                | This Study             | Hygromycin (50 µg/ml)     |
| pDM317-2xFyve                                               | This Study             | G418 (20 µg/ml)           |
| GRP1-PH-pDM323                                              | Ref 38                 | G418 (20 µg/ml)           |
| pDM451-EEA1 <sup>1-209</sup>                                | This Study             | Hygromycin (50 µg/ml)     |
| <b>Plasmid for expression in HT 1080 cells</b>              |                        |                           |
| pCDH-CMV-mCherry-RAB5A                                      | This Study             | Puromycin(10 µg/m)        |
| pCDH-CMV-mEmerald-RAB7A                                     | from Dr. Dong Li's Lab | Puromycin(10 µg/ml)       |
| <b>Plasmid for gene knockout</b>                            |                        |                           |
| pBluescrip-BSR                                              |                        |                           |
| pBluescrip-PripA(Arm1)-BSR-PripA(Arm2)                      | This Study             | Blasticidin (10 µg/ml)    |
| pBluescrip-TbcrA(Arm1)-BSR-TbcrA(Arm2)                      | This Study             | Blasticidin (10 µg/ml)    |
| pBluescrip-PIKfyve(Arm1)-BSR-PIKfyve(Arm2)                  | This Study             | Blasticidin (10 µg/ml)    |
| pDEX-NLS-Cre                                                |                        | G418 (20 µg/ml)           |

| <b>Plasmid for yeast two hybrid assay</b>       |                              |
|-------------------------------------------------|------------------------------|
| pGADT7                                          | from Dr. Xiaochen Wang's Lab |
| pGBKT7                                          | from Dr. Xiaochen Wang's Lab |
| pGADT7-PripA                                    | This Study                   |
| pGADT7-PripA- $\Delta$ PH                       | This Study                   |
| pGADT7-TbcrA-TBC                                | This Study                   |
| pGBKT7-Rab5A( $\Delta$ CCN)                     | This Study                   |
| pGBKT7-Rab5A <sup>Q68L</sup> ( $\Delta$ CCN)    | This Study                   |
| pGBKT7-Rab5A <sup>S23N</sup> ( $\Delta$ CCN)    | This Study                   |
| pGBKT7-Rab7A( $\Delta$ CC)                      | This Study                   |
| pGBKT7-Rab7A <sup>Q67L</sup> ( $\Delta$ CC)     | This Study                   |
| pGBKT7-Rab7A <sup>T22N</sup> ( $\Delta$ CC)     | This Study                   |
| pGBKT7-Rab4( $\Delta$ CSC)                      | This Study                   |
| pGBKT7-Rab4 <sup>Q66L</sup> ( $\Delta$ CSC)     | This Study                   |
| pGBKT7-Rab5B                                    | This Study                   |
| pGBKT7-Rab5B <sup>Q107L</sup>                   | This Study                   |
| pGBKT7-Rab6( $\Delta$ CSSSRC)                   | This Study                   |
| pGBKT7-Rab6 <sup>Q65L</sup> ( $\Delta$ CSSSRC)  | This Study                   |
| pGBKT7-Rab7B( $\Delta$ CC)                      | This Study                   |
| pGBKT7-Rab7B <sup>Q61L</sup> ( $\Delta$ CC)     | This Study                   |
| pGBKT7-Rab8A( $\Delta$ CC)                      | This Study                   |
| pGBKT7-Rab8A <sup>Q74L</sup> ( $\Delta$ CC)     | This Study                   |
| pGBKT7-Rab8B( $\Delta$ CC)                      | This Study                   |
| pGBKT7-Rab8B <sup>Q74L</sup> ( $\Delta$ CC)     | This Study                   |
| pGBKT7-Rab11A( $\Delta$ CC)                     | This Study                   |
| pGBKT7-Rab11A <sup>Q72L</sup> ( $\Delta$ CC)    | This Study                   |
| pGBKT7-Rab11B( $\Delta$ CC)                     | This Study                   |
| pGBKT7-Rab11B <sup>Q70L</sup> ( $\Delta$ CC)    | This Study                   |
| pGBKT7-Rab11C( $\Delta$ CC)                     | This Study                   |
| pGBKT7-Rab11C <sup>Q69L</sup> ( $\Delta$ CC)    | This Study                   |
| pGBKT7-Rab14( $\Delta$ CSC)                     | This Study                   |
| pGBKT7-Rab14 <sup>Q67L</sup> ( $\Delta$ CSC)    | This Study                   |
| pGBKT7-Rab18( $\Delta$ CSC)                     | This Study                   |
| pGBKT7-Rab18 <sup>Q65L</sup> ( $\Delta$ CSC)    | This Study                   |
| pGBKT7-Rab21( $\Delta$ CCSN)                    | This Study                   |
| pGBKT7-Rab21 <sup>Q66L</sup> ( $\Delta$ CCSN)   | This Study                   |
| pGBKT7-Rab24( $\Delta$ CC)                      | This Study                   |
| pGBKT7-Rab32A( $\Delta$ CCK)                    | This Study                   |
| pGBKT7-Rab32A <sup>Q75L</sup> ( $\Delta$ CCK)   | This Study                   |
| pGBKT7-Rab32B( $\Delta$ CCK)                    | This Study                   |
| pGBKT7-Rab32C( $\Delta$ CC)                     | This Study                   |
| pGBKT7-Rab32C <sup>Q87L</sup> ( $\Delta$ CC)    | This Study                   |
| pGBKT7-Rab32D( $\Delta$ CFNCK)                  | This Study                   |
| pGBKT7-Rab32D <sup>Q68L</sup> ( $\Delta$ CFNCK) | This Study                   |
| pGBKT7-RabA( $\Delta$ CIIN)                     | This Study                   |
| pGBKT7-RabA <sup>Q67L</sup> ( $\Delta$ CIIN)    | This Study                   |

|                                              |                           |
|----------------------------------------------|---------------------------|
| pGBKT7-RabC( $\Delta$ CC)                    | This Study                |
| pGBKT7-RabC <sup>Q67L</sup> ( $\Delta$ CC)   | This Study                |
| pGBKT7-RabF( $\Delta$ CIIN)                  | This Study                |
| pGBKT7-RabJ( $\Delta$ CCG)                   | This Study                |
| pGBKT7-RabJ <sup>Q68L</sup> ( $\Delta$ CCG)  | This Study                |
| pGBKT7-RabL( $\Delta$ CC)                    | This Study                |
| pGBKT7-RabL <sup>Q66L</sup> ( $\Delta$ CC)   | This Study                |
| pGBKT7-RabO( $\Delta$ CFIL)                  | This Study                |
| pGBKT7-RabO <sup>Q67L</sup> ( $\Delta$ CFIL) | This Study                |
| pGBKT7-RabQ( $\Delta$ CCK)                   | This Study                |
| pGBKT7-RabQ <sup>Q64L</sup> ( $\Delta$ CCL)  | This Study                |
| <b>Plasmid for protein purification</b>      |                           |
| pGEX 4T-1                                    |                           |
| pGEX 4T-1-Rab5A <sup>Q68L</sup>              | This Study                |
| pGEX 4T-1-Rab5A <sup>S23N</sup>              | This Study                |
| pGEX 4T-1-Rab7A <sup>Q67L</sup>              | This Study                |
| pGEX 4T-1-Rab7A <sup>T22N</sup>              | This Study                |
| pGEX 6P-1-PH <sup>124-219</sup>              | This Study                |
| pGEX 6P-1-TBC <sup>820-1194</sup>            | This Study                |
| pGEX 6P-1-TBC <sup>820-1194;mut</sup>        | This Study                |
| pET-MBP-3C-Rab5A( $\Delta$ CCN)              | This Study                |
| pET-MBP-3C-Rab7A( $\Delta$ CC)               | This Study                |
| pGEX 4T-1-EEA1 <sup>1-209</sup>              | from Dr. Hong Zhang's Lab |



**Table S2: Primers used in this study. All primer sequences are given in 5' to 3' direction and each primer is designated as forward (F) or reverse (R).**

| Expression in <i>Dictyostelium</i> cells                               |                   |                                                                                        |
|------------------------------------------------------------------------|-------------------|----------------------------------------------------------------------------------------|
| Usage                                                                  | Plasmid backbone  | Sequence                                                                               |
| PripA-GFP and PripA-RFP                                                | pDM323 and pDM451 | F: CGGGAGCTCAAATAAAAATGTCGTCTGTAAGAGCCCAA TTTG                                         |
|                                                                        |                   | R: CGGACTAGTAGCTTGATTAATTGATTTGAAATC                                                   |
| PripA-PH-GFP and PripA-PH-RFP                                          | pDM323 and pDM451 | R: CGGACTAGTCTTTTGAGAATTTTGTAATGATTG                                                   |
| PripA-ΔPH-GFP and PripA-ΔPH-RFP                                        | pDM323 and pDM451 | F: CGGGAGCTCAAATAAAAATGCAATCATTACAAAATTCTC AAAAG                                       |
| GFP-TbcrA                                                              | pDM317            | F: CGGGAGCTCATGGATGACGAAGATTATAGAAATTC                                                 |
|                                                                        |                   | R: CGGACTAGTAATAAAAATCTTTATTAATTAATAGTATAATT TTTTAAATAAATTTTGGAATATGAACGGCGGAAATTGAATC |
| GFP-TbcrA-RCC1                                                         | pDM317            | R: CGGACTAGTACCATCAAATACATCTAAACTAC                                                    |
| GFP-TbcrA-TBC                                                          | pDM317            | F: CGGGAGCTCATGGGTAGTTTAGATGTATTTGATG                                                  |
| GFP-TbcrA <sup>R987A</sup>                                             | pDM317            | mutation F: GTTGATTTACCAgcAACTTTCCC                                                    |
|                                                                        |                   | mutation R: GGGAAAGTTgcTGGTAAATCAAC                                                    |
|                                                                        |                   | F: CGGGAGCTCATGGATGACGAAGATTATAGAAATTC                                                 |
|                                                                        |                   | R:CGGACTAGTACTAGATCCGCTAGCTTAAATA                                                      |
| PripA + RFP-TbcrA and PripA + RFP-TbcrA <sup>R987A</sup>               | pDM344 & pDM449   | PripA F: CGCGGATCCATGTCGTCTGTAAGAGCCCAATTTG                                            |
|                                                                        |                   | PripA R: CGGACTAGTTTAAGCTTGATTAATTGATTTGAAATC                                          |
|                                                                        |                   | TBCR1 F: CGGGAGCTCATGGATGACGAAGATTATAGAAATTC                                           |
|                                                                        |                   | TBCR1 R:CGGACTAGTACTAGATCCGCTAGCTTAAATA                                                |
| PripA + RFP-DDB_G0269982 and PripA + RFP-DDB_G0269982 <sup>R322A</sup> | pDM344 & pDM449   | mutation F: CAAGATATTTTAGAAgcAATTTTATATTTATG                                           |
|                                                                        |                   | mutation R: CCCATAAATATAAAATTgcTTCTAAAATATC                                            |
|                                                                        |                   | F: CGGGAGCTCATGAGTAACCATAGTGATACAAATAG                                                 |
|                                                                        |                   | R: CTAGCTAGCCTTTTTAATAATATTATTATTTAAATTTATA TTATTACTTTTTAAATGTGATTGAGC TTCTTCATATAATG  |
| GFP- and RFP-Rab5A                                                     | pDM317 and pDM449 | F: CGGGAGCTCATGAATAATAATAAAGATATTTTC                                                   |
|                                                                        |                   | R: CGGACTAGTGTTACAACATTTGTTTTCTTTCC                                                    |
| GFP- and RFP-Rab7A                                                     | pDM317 and pDM449 | F: CGGGAGCTCATGGCCACAAAGAAAAGG                                                         |
|                                                                        |                   | R: CGGACTAGTACAACAACCTGATTTAGCTGG                                                      |
| GFP-Rab5B                                                              | pDM317            | F: CGGGAGCTCATGTCAAATGCAAATAACAATGGAC                                                  |
|                                                                        |                   | R: CTAGCTAGCTTTATAATTTTCAATTAATCTTCTAC                                                 |
| GFP-Rab7B                                                              | pDM317            | F: CGGGAGCTCATGACAAAAGGAAGGAAAATTATTAAG                                                |
|                                                                        |                   | R: CTAGCTAGCACAAACATGAACCTTTGATTTGACTTTTTTTCTG                                         |
| GFP-Rab32A                                                             | pDM317            | F: CGGGAGCTCATGTCAAACAACCCAGCTGATGATG                                                  |
|                                                                        |                   | R: CTAGCTAGCTTTACAACAACCTTGACCAGTTGAAG                                                 |
| GFP-Rab32D                                                             | pDM317            | F: CGGGAGCTCATGATAAATATGACAGAGACAAAAC                                                  |
|                                                                        |                   | R: CTAGCTAGCTTTACAATTGAAACAACCTGAAGG                                                   |

|                                                     |                      |                                                                                                                                                           |
|-----------------------------------------------------|----------------------|-----------------------------------------------------------------------------------------------------------------------------------------------------------|
| GFP-RabJ                                            | pDM317               | F: CGGGAGCTCATGGATCCATTGTCAATATCAATG<br>R: CTAGCTAGCACCACAACATTGATCACTATTATCAC                                                                            |
| VacA-RFP                                            | pDM451               | F: CGGGAGCTCaaataaaaaATGATTGAAGGTAGTGGTAG<br>R: CGGACTAGTATTCTTTTTTTGTTGAATAG                                                                             |
| TAPP1-GFP and<br>TAPP1-RFP                          | pDM323 and<br>pDM451 | F: CGGGAGCTCATGCCTTATGTGGATCGTCAGAATC<br>R: CTAGCTAGCCACGTCAGTACCAGGAAAGGCTCGC                                                                            |
| <b>Expression in HT1080 cells</b>                   |                      |                                                                                                                                                           |
| pCDH-CMV-mCherry-<br>RAB5A                          | pCDH-CMV             | RAB5A-F: TCCGGACTCAGATCTCGAGCCATGGCTAGTC<br>GAGGCGCA                                                                                                      |
|                                                     |                      | RAB5A-R: TCCTTCGCGGCCGCGGATCCTTAGTTACTAC<br>AACACTGATTCCTGGTTGG                                                                                           |
|                                                     |                      | mCherry-F: GCTAGCGAATTCATGGTGAGCAATGGCGAG                                                                                                                 |
|                                                     |                      | mCherry-R: AGATCTGAGTCCGGACTTGTACAGCTCGTCC<br>ATGCC                                                                                                       |
| <b>Generation of knockout cells</b>                 |                      |                                                                                                                                                           |
| <i>pripA</i> knockout                               | pBluescript-BSR      | Insert 1 F: cggGGTACCGTTCCCACCCCTGGTCAAATTG<br>Insert 1 R: cccAAGCTTCTAGTGGTGCTCTAGAAATTTG                                                                |
|                                                     |                      | Insert 2 F: cggACTAGTCAAATGAAGAGATGGATGCAAAG<br>Insert 2 R: ataagaatGCGGCCGCGCTTGATTAATTGATTT<br>GAAATCC                                                  |
|                                                     |                      | Insert 1 F: CGGGGTACCATGGATGACGAAGATTATAGAAT<br>TC                                                                                                        |
|                                                     |                      | Insert 1 R: CCGGAATTCGACTTGATGATGTTATTGTTGAAC<br>Insert 2 F: CGGACTAGTGAGTATTCAACATTTATTAATAAC<br>Insert 2 R: ATAAGAATGCGGCCGCGGAATATGAACGGCGG<br>AAATTG  |
| <i>tbcra</i> knockout                               | pBluescript-BSR      | Insert 1 F: CACGGTACCCAAAATAAATATCTTTTTGATACG<br>TG                                                                                                       |
|                                                     |                      | Insert 1 R: GAGGTCGACCTGCCATTATTAGGATTATTTGAAC<br>Insert 2 F: CGGACTAGTCAAGTCCAACAAATTAATAAATAAC<br>Insert 2 R: CGGCGGCCGCCATTTGATATGTTAAATCAGAT<br>AATGG |
|                                                     |                      | Insert 1 F: CACGGTACCCAAAATAAATATCTTTTTGATACG<br>TG                                                                                                       |
|                                                     |                      | Insert 1 R: GAGGTCGACCTGCCATTATTAGGATTATTTGAAC<br>Insert 2 F: CGGACTAGTCAAGTCCAACAAATTAATAAATAAC<br>Insert 2 R: CGGCGGCCGCCATTTGATATGTTAAATCAGAT<br>AATGG |
| <i>pikfyve</i> knockout                             | pBluescript-BSR      | Insert 1 F: CACGGTACCCAAAATAAATATCTTTTTGATACG<br>TG                                                                                                       |
|                                                     |                      | Insert 1 R: GAGGTCGACCTGCCATTATTAGGATTATTTGAAC<br>Insert 2 F: CGGACTAGTCAAGTCCAACAAATTAATAAATAAC<br>Insert 2 R: CGGCGGCCGCCATTTGATATGTTAAATCAGAT<br>AATGG |
|                                                     |                      | Insert 1 F: CACGGTACCCAAAATAAATATCTTTTTGATACG<br>TG                                                                                                       |
|                                                     |                      | Insert 1 R: GAGGTCGACCTGCCATTATTAGGATTATTTGAAC<br>Insert 2 F: CGGACTAGTCAAGTCCAACAAATTAATAAATAAC<br>Insert 2 R: CGGCGGCCGCCATTTGATATGTTAAATCAGAT<br>AATGG |
| <b>Expression in AH109 (Yeast two-hybrid assay)</b> |                      |                                                                                                                                                           |
| AD-PripA                                            | pGADT7               | F: CGCCATATGATGTCGTCTGTAAGAGCCCAATTTG<br>R: CGCGGATCCAGCTTGATTAATTTGATTTGAAATC                                                                            |
| AD-PripA <sup>219-808</sup>                         | pGADT7               | F: CGCCATATGATGCAATCATTACAAAATTCTCAAAG                                                                                                                    |
| AD-Tbcra <sup>743-1194</sup>                        | pGADT7               | F: CGCCATATGATAAAAAGAATGAAGAACCATCACCT<br>R: CGCGGATCCAATAAAAATCTTTATTAATTAATAGTATAATT<br>TTTTTAATAAATTTTGGAAATATGAAC GGCGGAAATTGAATC                     |
| BD-Rab5A( $\Delta$ CCN)                             | pGBKT7               | F:CGCCATATGATGAATAATAATAAAGATATTTT<br>R:CGCGGATCCTTTGTTTTCTTTCCAGTGTTACC                                                                                  |
| BD-Rab5A <sup>Q68L</sup> ( $\Delta$ CCN)            | pGBKT7               | mutation F: CAGCTGGTtAGAACGTTATCAT<br>mutation R: ATAACGTTCAaaACCAGCTGTATC                                                                                |

|                                            |        |                                                                                       |
|--------------------------------------------|--------|---------------------------------------------------------------------------------------|
| BD-Rab5A <sup>S23N</sup> ( $\Delta$ CCN)   | pGBKT7 | mutation F: GTAGGCAAAAaTTCTTTAGTATTGA<br>mutation R: TCAATACTAAAGAATTTTTGCCTAC        |
| BD-Rab7A( $\Delta$ CC)                     | pGBKT7 | F: CGCCATATGATGGCCACAAAGAAAAAGG<br>R: CGCGGATCCACCTGATTTAGCTGGTTGTGGTTC               |
| BD-Rab7A <sup>Q67L</sup> ( $\Delta$ CC)    | pGBKT7 | mutation F: GATACAGCTGGTtAGAACGTTTC<br>mutation R: TAATGATTGGAAACGTTCTaaACCAGC        |
| BD-Rab7A <sup>T22N</sup> ( $\Delta$ CC)    | pGBKT7 | mutation F: GGTGTTGGTAAAAaTCTCTCATGAATCAAT<br>mutation R: GAGAGAaTTTTACCAACACCTGAATC  |
| BD-Rab4( $\Delta$ CSC)                     | pGBKT7 | F: CGCCATATGATGGGAAAACCTTTATATCTTG<br>R: CGCGGATCCATTAGATGAATCACCAGGTTTCTTTG          |
| BD-Rab4 <sup>Q66L</sup> ( $\Delta$ CSC)    | pGBKT7 | mutation F: GATACTGCCGACtAGAAAGATTTAG<br>mutation R: CTAAATCTTTCTaGTCCGGCAGTATC       |
| BD-Rab5B                                   | pGBKT7 | F: CGCCATATGATGTCAAATGCAAATAACAATGGAC<br>R: CGCGGATCCTTTATAATTTCAATTAATCTTCTAC        |
| BD-Rab5B <sup>Q107L</sup>                  | pGBKT7 | mutation F: GATACTGCAGGACtAGAACGTTATAG<br>mutation R: CTATAACGTTCTaGTCCTGCAGTATC      |
| BD-Rab6( $\Delta$ CSSSRC)                  | pGBKT7 | F: CGCCATATGATGGAATCATTATCAAAATATAAAT<br>R: CGCGGATCCAAATCCATCACCTTCTTTTAAGGC         |
| BD-Rab6 <sup>Q65L</sup> ( $\Delta$ CSSSRC) | pGBKT7 | mutation F: GATACTGCAGGTcTAGAAAGATTTAG<br>mutation R: CTAAATCTTTCTaGACCTGCAGTATC      |
| BD-Rab7B( $\Delta$ CC)                     | pGBKT7 | F: CGCCATATGATGACAAAAGGAAGAAAATTATTAAG<br>R: CGCGGATCCTGAACTTTGATTTGACTTTTTTTCTG      |
| BD-Rab7B <sup>Q61L</sup> ( $\Delta$ CC)    | pGBKT7 | mutation F: CACAAGTGGTcTAGAGAGATTCAG<br>mutation R: CTGAATCTCTCTaGACCACTTGTG          |
| BD-Rab8A( $\Delta$ CC)                     | pGBKT7 | F: CGCCATATGATGACTTCTCCAGCAACAAATAAATC<br>R: CGCGGATCCAGCTTTTTTCTTATTGTTATTTGCACC     |
| BD-Rab8A <sup>Q74L</sup> ( $\Delta$ CC)    | pGBKT7 | mutation F: GGATACTGCAGGTcTAGAAAGATTCAG<br>mutation R: CTGAATCTTTCTaGACCTGCAGTATCC    |
| BD-Rab8B( $\Delta$ CC)                     | pGBKT7 | F: CGGGAATTCATGACTTCTCCAGCAACAAATAAAC<br>R: CGCGGATCCAGTATTTTTCTTATTGTTGGAGTAATG      |
| BD-Rab8B <sup>Q74L</sup> ( $\Delta$ CC)    | pGBKT7 | mutation F: GACACTGCAGGTcTAGAAAGATTCAG<br>mutation R: CTGAATCTTTCTaGACCTGCAGTGTC      |
| BD-Rab11A( $\Delta$ CC)                    | pGBKT7 | F: CGCCATATGATGACTTCAAAGGATCACAAG<br>R: CGCGGATCCACCAGATTTGGCGGCTGGTGGTTC             |
| BD-Rab11A <sup>Q72L</sup> ( $\Delta$ CC)   | pGBKT7 | mutation F: GGATACTGCAGGTcTAGAAAGATATAG<br>mutation R: CTATATCTTTCTaGACCTGCAGTATCC    |
| BD-Rab11B( $\Delta$ CC)                    | pGBKT7 | F: CGCCATATGATGGTACTAAAACAATAGAATATG<br>R: CGCGGATCCATCATATACTGGTTTATTAATTG           |
| BD-Rab11B <sup>Q70L</sup> ( $\Delta$ CC)   | pGBKT7 | mutation F: GATACTGCAGGTcTAGAAAAATATAATTC<br>mutation R: GAATTATTTTTTCTaGACCTGCAGTATC |
| BD-Rab11C( $\Delta$ CC)                    | pGBKT7 | F: CGCCATATGATGCCACAAGAAGAAGCAG<br>R: CGCGGATCCACCCTTTTCTTTTCTTGATGAG                 |
| BD-Rab11C <sup>Q69L</sup> ( $\Delta$ CC)   | pGBKT7 | mutation F: GATACTGCAGGTcTAGAAAGATTTAG<br>mutation R: CTAAATCTTTCTaGACCTGCAGTATC      |
| BD-Rab14( $\Delta$ CSC)                    | pGBKT7 | F: CGGGAATTCATGTCATTTCCATATGAATATATAT<br>R: CGCGGATCCTTTACTGGCATCTTGAGGTTTATCAG       |

|                                    |        |                                                                                                |
|------------------------------------|--------|------------------------------------------------------------------------------------------------|
| BD-Rab14 <sup>Q67L</sup> (ΔCSC)    | pGBKT7 | mutation F: GATACTGCAGGTcTAGAAAGATTCAGG<br>mutation R: CCTGAATCTTTCTaGACCTGCAGTATC             |
| BD-Rab18(ΔCSC)                     | pGBKT7 | F: CCGGAATTCATGGAAGAAGATAAACAATATAAAG<br>R: CGCGGATCCAACACCTTGATTATGATCAGGTTCC                 |
| BD-Rab18 <sup>Q65L</sup> (ΔCSC)    | pGBKT7 | mutation F: GGATACTGCAGGACTAGAGAAATTTAG<br>mutation R: CTAAATTTCTCTaGTCCTGCAGTATCC             |
| BD-Rab21(ΔCCSN)                    | pGBKT7 | F: CGCCATATGATGACAGATACTGAAAAAAGTTTTAAAG<br>R: CGCGGATCCACCTGGTTGTTTATTACCTGAATC               |
| BD-Rab21 <sup>Q66L</sup> (ΔCCSN)   | pGBKT7 | mutation F: GATACAGCAGGACTAGAAAGATTTTCATG<br>mutation R: CATGAAATCTTTCTaGTCCTGCTGTATC          |
| BD-Rab24(ΔCC)                      | pGBKT7 | F: CGCCATATGATGACAAAGACAAAATTGATC<br>R: CGCGGATCCGCCACCTTTTTTCTTTTGAGTTTG                      |
| BD-Rab32A(ΔCCK)                    | pGBKT7 | F: CGCCATATGATGTCAAACAACCCAGCTGATGATG<br>R: CCGGAATTCACCTTGACCAGTTGAAGTTGGTTG                  |
| BD-Rab32A <sup>Q75L</sup> (ΔCCK)   | pGBKT7 | mutation F: GATATTGCAGGTcTAGAAAGATTTGG<br>mutation R: CCAAATCTTTCTaGACCTGCAATATC               |
| BD-Rab32B(ΔCCK)                    | pGBKT7 | F: CGCCATATGATGAATAGAGGTGATATATTTGC<br>R: CGCGGATCCTGATTTTGAATCATCAGATTTCTC                    |
| BD-Rab32C(ΔCC)                     | pGBKT7 | F: CGCGAATTCATGTATAGTAATAAAAATGATAAAG<br>R: CGCGGATCCAGTTTTTGATTGAGTTGGTGTTG                   |
| BD-Rab32C <sup>Q87L</sup> (ΔCC)    | pGBKT7 | mutation F: GATATAGCAGGCcTAGAAAGATTTGG<br>mutation R: CCAAATCTTTCTaGGCCTGCTATATC               |
| BD-Rab32D(ΔCFNCK)                  | pGBKT7 | F: CGCCATATGATGATAAATATGACAGAGACAAAAC<br>R: CGCGGATCCACTTGAAGGTGAGGAAGTTGAAGG                  |
| BD-Rab32D <sup>Q68L</sup> (ΔCFNCK) | pGBKT7 | mutation F: GATACAGCAGGACTAGAGAAATATTGG<br>mutation R: CCAATATTTCTCTaGTCCTGCTGTATC             |
| BD-RabA(ΔCIIN)                     | pGBKT7 | F: CGCCATATGATGAGTAAAAAATATGAACATT<br>R: CGCGGATCCACTTTTTTTGGGATTGAGGTTT                       |
| BD-RabA <sup>Q67L</sup> (ΔCIIN)    | pGBKT7 | mutation F: GATACTGCTGGACTAGAACGATTTAG<br>mutation R: CTAAATCGTTCTaGTCCAGCAGTATC               |
| BD-RabC(ΔCC)                       | pGBKT7 | F: CGCCATATGATGGAAGAAGAAATTTTATATAAAA<br>R: CGCGGATCCGCCTCTCTTTTGACCAACTTCTG                   |
| BD-RabC <sup>Q67L</sup> (ΔCC)      | pGBKT7 | mutation F: CACTGCAGGTcTAGAAAGATTCAAATC<br>mutation R: GATTTGAATCTTTCTaGACCTGCAGTG             |
| BD-RabF(ΔCIIN)                     | pGBKT7 | F: CGCCATATGATGAGTAAAGAATATGAACACTTATTC<br>R: CGCGGATCCATTATTTTTTTTCGGGGATTGTGTTTTTTT<br>TAGAG |
| BD-RabJ(ΔCCG)                      | pGBKT7 | F: CGCCATATGATGGATCCATTGTCAATATCAATG<br>R: CCGGAATTCATTGATCACTATTATCACTATAATTTG                |
| BD-RabJ <sup>Q68L</sup> (ΔCCG)     | pGBKT7 | mutation F: GATAGTGCTGGACTAGATAGATTTTCG<br>mutation R: CGAAATCTATCTaGTCCAGCACTATC              |
| BD-RabL(ΔCC)                       | pGBKT7 | F: CGCCATATGATGAAAGAAGAAAAACAATGTTAAAG<br>R: CGCGGATCCTGTTCCAACCTTTGACTTCTTCCGG                |
| BD-RabL <sup>Q66L</sup> (ΔCC)      | pGBKT7 | mutation F: GATACCTGTGGTcTAGAACGTTTTCAAG<br>mutation R: CTTGAAAACGTTCTaGACCACAGGTATC           |

|                                                          |            |                                                                                                                                                                  |
|----------------------------------------------------------|------------|------------------------------------------------------------------------------------------------------------------------------------------------------------------|
| BD-RabO( $\Delta$ CFIL)                                  | pGBKT7     | F: CGCCATATGATGGATATAGATAATTCTATTTTA<br>R: CGCGGATCCCATTCTTTATTTTTTTTCATTTTG                                                                                     |
| BD-RabO <sup>Q67L</sup> ( $\Delta$ CFIL)                 | pGBKT7     | mutation F: GATACTGGAGGTcTAGAAAGATTTAAAAC<br>mutation R: GTTTTAAATCTTTCTaGACCTCCAGTATC                                                                           |
| BD-RabQ( $\Delta$ CCK)                                   | pGBKT7     | F: CGCCATATGATGGAAGAATATCATTTAAAGTG<br>R: CGCGGATCCTTCACTCTTTGGTTTCTTTGGGGT                                                                                      |
| BD-RabQ <sup>Q64L</sup> ( $\Delta$ CCL)                  | pGBKT7     | mutation F: GATACAGCAGGTcTAGAATCATTTAG<br>mutation R: CTAAATGATTCTaGACCTGCTGTATC                                                                                 |
| <b>Expression in <i>E. coli</i></b>                      |            |                                                                                                                                                                  |
| GST-Rab5A <sup>Q68L</sup> and -<br>Rab5A <sup>S23N</sup> | pGEX-4T-1  | F: CGCGGATCCATGAATAATAATAAAGATATTTTC<br>R: ATAAGAATGCGGCCGCGTTACAACATTTGTTTTTCTT<br>TCC                                                                          |
| GST-Rab7A <sup>Q67L</sup> and -<br>Rab7A <sup>T22N</sup> | pGEX-4T-1  | F: CGCGGATCCATGGCCACAAAGAAAAAGG<br>R: ATAAGAATGCGGCCGCACAACAACCTGATTTAGCTGG                                                                                      |
| GST-PH <sup>124-219</sup>                                | pGEX-6P-1  | F: CCGGAATTCATGCCACCGATTCTCAGTGGTTACTTAAAG<br>R: CCGCTCGAGTTATTGATAATACTTTTTAAATTCTTTT<br>AAAC                                                                   |
| GST-TBC and GST-TBC <sup>mut</sup>                       | pGEX-6P-1  | F: CCGGAATTCATGGGCGGCTTTGAAACCATTAAG<br>R: CCGCTCGAGTTAAATAAAATCCTTATTG                                                                                          |
| GST-TBC <sup>mut</sup>                                   | pGEX-6P-1  | mutation F1: GATCTGCCGgcgACCTTTCCGCAG<br>mutation R1: GGAAAGGTcgcCGGCAGATCCACC<br>mutation F2: GATTGGTTATGTTgcGGGTATGAG<br>mutation R2: GATAGCTCATACCCgcAACATAAC |
| His-MBP-Rab5A                                            | pET-MBP-3C | F: CGCGGATCCATGAATAATAATAAAGATATTTTC<br>R: ATAAGAATGCGGCCGCTTAGTTTTTGTTCCTTTTC<br>CAGTGTTACC                                                                     |
| His-MBP-Rab7A                                            | pET-MBP-3C | F: CGCGGATCCATGGCCACAAAGAAAAAGG<br>R: ATAAGAATGCGGCCGCTTAACCTGATTTAGCTGGTT<br>GTGGTTC                                                                            |

| <b>Table S3: GAP proteins tested by Y2H.</b> |                               |                                                                                                                                                                     |
|----------------------------------------------|-------------------------------|---------------------------------------------------------------------------------------------------------------------------------------------------------------------|
| <b>Gene number/name</b>                      | <b>Truncation used in Y2H</b> | <b>Gene information</b>                                                                                                                                             |
| DDB_G0275421                                 | 754-945 aa                    | contains 2 GRAM domains, one RabGAP/TBC domain, and one EF hand domain                                                                                              |
| DDB_G0295717                                 | 85-332 aa                     | RabGAP/TBC domain-containing protein, calcium-binding EF-hand domain-containing protein, similar to TBC1 domain family member GTPase-activating proteins            |
| DDB_G0269982                                 | 237-462 aa                    | TBC domain protein, putative Rab GTPase-activating protein, similar to human TBC1D22B and <i>S. pombe</i> gyp1                                                      |
| DDB_G0288811                                 | 530-748 aa                    | very similar to TBC1 domain family member 15 proteins and yeast GYP7                                                                                                |
| DDB_G0283055                                 | 40-223 aa                     | very similar to the mammalian TBC1 domain family member 20 protein, a potential multi-pass membrane protein                                                         |
| tbck                                         | 657-844 aa                    | similar to TBCK in human, fly, and worm; unlikely to function as a kinase as it does not contain a catalytic aspartate                                              |
| DDB_G0288949                                 | 47-401 aa                     | TBC1 domain family member 7                                                                                                                                         |
| DDB_G0279511                                 | 659-1011 aa                   | RabGAP/TBC domain-containing protein                                                                                                                                |
| DDB_G0281137                                 | 77-303 aa                     | RabGAP/TBC domain-containing protein                                                                                                                                |
| DDB_G0278601                                 | 289-390 aa                    | RabGAP/TBC domain-containing protein                                                                                                                                |
| DDB_G0270856                                 | 505-723 aa                    | RabGAP/TBC domain-containing protein, GRAM domain-containing protein                                                                                                |
| bub2                                         | 63-244 aa                     | RabGAP/TBC domain-containing protein, putative mitotic checkpoint protein                                                                                           |
| DDB_G0289735                                 | 154-346 aa                    | RabGAP/TBC domain-containing protein                                                                                                                                |
| DDB_G0287379                                 | 790-979 aa                    | ankyrin repeat-containing protein, RabGAP/TBC domain-containing protein                                                                                             |
| DDB_G0277967                                 | 133-321 aa                    | RabGAP/TBC domain-containing protein                                                                                                                                |
| DDB_G0288405                                 | 290-480 aa                    | RabGAP/TBC domain-containing protein, TLDC domain-containing protein                                                                                                |
| DDB_G0280253                                 | 374-729 aa                    | RabGAP/TBC domain-containing protein                                                                                                                                |
| DDB_G0283285                                 | 1050-1386 aa                  | RabGAP/TBC domain-containing protein                                                                                                                                |
| DDB_G0278181                                 | 641-830 aa                    | ankyrin repeat-containing protein, RabGAP/TBC domain-containing protein                                                                                             |
| DDB_G0282303                                 | 523-712 aa                    | ankyrin repeat-containing protein, RabGAP/TBC domain-containing protein                                                                                             |
| DDB_G0284995                                 | 30-229 aa                     | ankyrin repeat-containing protein, RabGAP/TBC domain-containing protein                                                                                             |
| DDB_G0290597                                 | 29-198 aa                     | RabGAP/TBC domain-containing protein, B-box zinc finger-containing protein                                                                                          |
| DDB_G0276961                                 | 271-457 aa                    | C-terminus similar to <i>A. thaliana</i> plant adhesion molecule 1, <i>D. melanogaster</i> extracellular matrix adhesion protein Pollux, and human rab6 GAP GAPCENA |
